# Supplementary material for: Estimating the potential for dementia prevention through modifiable risk factors elimination in the real-world setting: a population-based study
Source: PubMed Central journal article supplement (PMC7414752; doi:10.1186/s13195-020-00661-y), 2020-08-07
Supplement: 13195_2020_661_MOESM1_ESM.pdf [file 13195_2020_661_MOESM1_ESM.pdf]

**Additional Table 1:** Proportional sub-distribution hazards assessment for diagnosis of dementia, univariable models.

| Risk factors          | Main                 |         | Time-varying covariates |         |
|-----------------------|----------------------|---------|-------------------------|---------|
|                       | Coeff. (95% CI)      | p value | Coeff. (95% CI)         | p value |
| <b>Non-modifiable</b> |                      |         |                         |         |
| Age (class 1935-37)   | 1.18 (0.12 - 2.23)   | 0.029   | -0.01 (-0.03 - 0.00)    | 0.058   |
| Sex (female)          | -0.23 (-1.15 - 0.70) | 0.629   | 0.00 (-0.01 - 0.01)     | 0.952   |
| APOE ε4               | 1.10 (0.12 - 2.08)   | 0.028   | -0.01 (-0.02 - 0.01)    | 0.385   |
| <b>Modifiable</b>     |                      |         |                         |         |
| Low education         | 0.22 (-0.74 - 1.17)  | 0.657   | 0.00 (-0.01 - 0.01)     | 0.816   |
| Obesity               | -0.08 (-1.12 - 0.95) | 0.972   | 0.01 (-0.01 - 0.01)     | 0.731   |
| Hypertension          | 0.52 (-0.70 - 1.73)  | 0.406   | -0.01 (-0.02 - 0.01)    | 0.625   |
| Diabetes              | 0.65 (-0.32 - 1.61)  | 0.188   | -0.01 (-0.02 - 0.01)    | 0.635   |
| Depression            | -0.11 (-1.97 - 1.75) | 0.909   | 0.01 (-0.02 - 0.03)     | 0.906   |
| Smoking               | 0.14 (-1.49 - 1.76)  | 0.868   | 0.00 (-0.02 - 0.02)     | 0.977   |
| Physical inactivity   | 1.74 (0.71 - 2.77)   | 0.001   | 0.02 (-0.01 - 0.01)     | 0.056   |
| Hearing loss          | 0.20 (-1.17 - 1.57)  | 0.779   | 0.00 (-0.02 - 0.02)     | 0.983   |
| Loneliness            | 0.82 (-0.49 - 2.14)  | 0.218   | -0.02 (-0.04 - 0.03)    | 0.107   |
| Heart disease         | 0.99 (0.06 - 1.93)   | 0.038   | -0.01 (-0.02 - 0.00)    | 0.231   |
| Stroke                | 0.49 (-0.93 - 1.91)  | 0.498   | 0.01 (-0.01 - 0.03)     | 0.435   |
| Head injury           | -0.65 (-2.61 - 1.32) | 0.519   | 0.01 (-0.02 - 0.03)     | 0.600   |
| Delirium              | 2.88 (1.43 - 4.33)   | 0.000   | -0.01 (-0.04 - 0.01)    | 0.304   |

**Additional Table 2:** Proportional sub-distribution hazards assessment for diagnosis of dementia, multivariable model.

| Risk factors        | Main                 |         | Time-varying covariates |         |
|---------------------|----------------------|---------|-------------------------|---------|
|                     | Coeff. (95% CI)      | p value | Coeff. (95% CI)         | p value |
| APOE ε4             | 1.02 (-0.03 - 2.08)  | 0.057   | -0.01 (-0.02 - 0.01)    | 0.399   |
| Low education       | 0.30 (-0.70 - 1.30)  | 0.556   | 0.01 (-0.01 - 0.01)     | 0.913   |
| Diabetes            | 0.57 (-0.38 - 1.53)  | 0.238   | 0.00 (-0.02 - 0.01)     | 0.737   |
| Physical inactivity | 1.54 (0.49 - 2.59)   | 0.004   | 0.00 (-0.01 - 0.02)     | 0.133   |
| Heart disease       | 1.08 (0.09 - 2.07)   | 0.033   | 0.01 (-0.02 - 0.01)     | 0.177   |
| Stroke              | -0.03 (-1.56 - 1.49) | 0.966   | 0.01 (-0.01 - 0.03)     | 0.223   |
| Delirium            | 2.66 (0.94 - 4.38)   | 0.002   | -0.01 (-0.02 - 0.03)    | 0.548   |
